# Supplementary material for: New In Situ Synthesis Method for Fe3O4/Flake Graphite Nanosheet Composite Structure and Its Application in Anode Materials of Lithium-Ion Batteries
Source: Hindawi journal article supplement (doi:10.1155/2018/2417949), 2018-01-01
Supplement: f1 [file 2417949.f1.pdf]

446

Supplement Materials

447

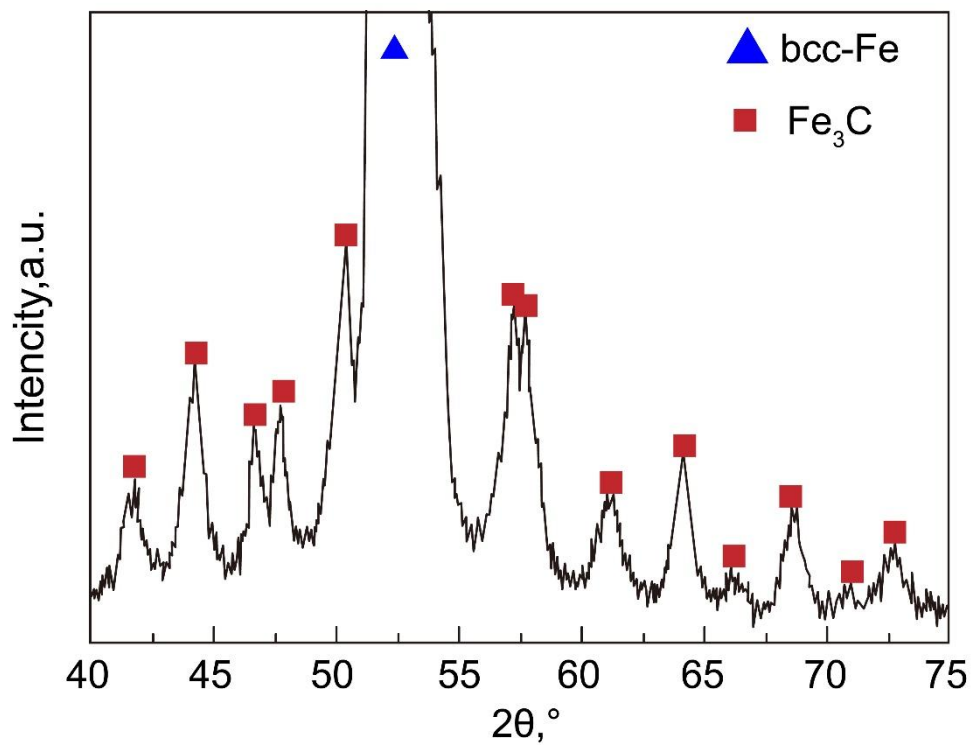

448

449 **Fig. S1.** XRD pattern of HPT-processed sample without further chemical treatment
